# Supplementary material
Source: PubMed Central journal article supplement (PMC1894896)
Supplement: NIHMS19252-supplement-suptbl1tbl5.pdf [file NIHMS19252-supplement-suptbl1tbl5.pdf]

Supplemental table 1. Cellular phenotypes of GABA<sub>A</sub> α1 mutants:

| Cortex                                                                                            | Cerebellum                                                                               | Reference:                                                                                          |
|---------------------------------------------------------------------------------------------------|------------------------------------------------------------------------------------------|-----------------------------------------------------------------------------------------------------|
| ↑ duration of GABA-mediated IPSCs in randomly selected neurons of layer II-III of visual cortex ^ | ↑↑ duration of GABA-mediated IPSCs in stellate and granule cells in slices and culture * | Vicini et al., 2001 *<br>Bosman et al., 2002 ^<br>Bosman et al., 2005b ^<br>Ortinski et al., 2004 * |
| No change in amplitude or frequency of GABA-mediated IPSCs ^                                      | No change or ↓ in amplitude or frequency of IPSCs *                                      |                                                                                                     |
| ↑ in α2, α3; ↓ in β2, γ2 proteins ^*                                                              | ↑ in α3, α4, α6; ↓ in β2, γ2 proteins ^*                                                 | Sur et al., 2001 ^<br>Kralic et al., 2002a *<br>Ogris et al., 2006 *<br>Kralic et al., 2006 *       |
| No change in GABA <sub>A</sub> α2 – α6 subunit mRNA abundance ^*                                  |                                                                                          | Heinen et al., 2003 ^<br>Ogris et al., 2006 *                                                       |
| ~ 50 % ↓ in density of GABA <sub>A</sub> receptors ^*                                             |                                                                                          | Sur et al., 2001 ^<br>Kralic et al., 2002a *                                                        |
| ↑ in filiform and ↓ in mushroom-shaped spines in layers II-IV of visual cortex ^                  |                                                                                          | Heinen et al., 2003 ^                                                                               |
| ↓ neuronal activity in visual cortex ^                                                            |                                                                                          | Bosman et al., 2005a ^                                                                              |
|                                                                                                   | ↓↓ in GABA currents in Purkinje neurons ^*, but no change in firing frequency *          | Sur et al., 2001 ^<br>Kralic et al., 2005 *                                                         |

\* - data from the Pittsburgh line, KO(P); ^ - data from the Merck line, KO(M).

Supplemental table 5. Results of RT-PCR. 5 genes were validated (p<0.05). All transcripts were down-regulated in knockout mice.

| Gene Symbol       | Full Name                                                      | Gene Bank ID | TaqMan® Assay ID | Fold Change arrays | Fold Change RT-PCR |
|-------------------|----------------------------------------------------------------|--------------|------------------|--------------------|--------------------|
| <b>Cortex</b>     |                                                                |              |                  |                    |                    |
| Sst               | Somatostatin                                                   | AI326805     | Mm00436671_m1    | 1.13               | 1.43               |
| Bet1l             | Blocked early in transport 1 homolog (S. cerevisiae)-like      | AI836964     | Mm00479577_m1    | 1.41               | 1.41               |
| Vamp1             | Vesicle-associated membrane protein 1                          | AI850070     | Mm00772309_g1    | 1.13               | 1.48               |
| <b>Cerebellum</b> |                                                                |              |                  |                    |                    |
| Scn4b             | Sodium channel, type IV, beta                                  | AI839703     | Mm01175562_m1    | 1.24               | 1.34               |
| Arhgef9           | Cdc42 guanine nucleotide exchange factor (GEF) 9 (Collybistin) | AI844993     | Mm01224682_m1    | 1.22               | 1.30               |
